# Supplementary material for: Heckman imputation models for binary or continuous MNAR outcomes and MAR predictors
Source: Springer Nature journal article supplement (doi:10.1186/s12874-018-0547-1), 2018-08-31
Supplement: MOESM1 [file 16089134]

# Heckman imputation models for binary or continuous MNAR outcomes and MAR predictors

J.-E. Galimard, S. Chevret, E. Curis and M. Resche-Rigon

## Additional file 1: Additional tables

This additional file contains 8 supplementary tables :

- Table S8. Binary  $Y$ : Simulation results for  $\beta_2 = 1$  with  $\rho = 0$ , representing a MAR mechanism, and  $\rho = 0.3$  and  $0.6$ , representing an MNAR mechanism.
- Table S9. Continuous  $Y$ : Simulation results for  $\beta_2 = 1$  with  $\rho = 0$ , representing a MAR mechanism, and  $\rho = 0.3$  and  $0.6$ , representing an MNAR mechanism.
- Table S10. Binary  $Y$ : Simulation results for  $\beta_2 = 1$  with  $\rho = 0$ , representing a MAR mechanism, and  $\rho = 0.3$  and  $0.6$ , representing an MNAR mechanism, in the presence of missing data on  $X_2$ .
- Table S11. Continuous  $Y$ : Simulation results for  $\beta_2 = 1$  with  $\rho = 0$ , representing a MAR mechanism, and  $\rho = 0.3$  and  $0.6$ , representing an MNAR mechanism, in the presence of MAR missing data on  $X_2$ .
- Table S12. Binary  $Y$ : Simulation results for  $n=200$ ,  $\beta_1 = 1$  with  $\rho = 0$ , representing a MAR mechanism, and  $\rho = 0.3$  and  $0.6$ , representing an MNAR mechanism.
- Table S13. Continuous  $Y$ : Simulation results for  $n=200$ ,  $\beta_1 = 1$  with  $\rho = 0$ , representing a MAR mechanism, and  $\rho = 0.3$  and  $0.6$ , representing an MNAR mechanism.
- Table S14. Binary  $Y$ : Simulation results for  $n=200$ ,  $\beta_1 = 1$  with  $\rho = 0$ , representing a MAR mechanism, and  $\rho = 0.3$  and  $0.6$ , representing an MNAR mechanism, in the presence of missing data on  $X_2$ .
- Table S15. Continuous  $Y$ : Simulation results for  $n=200$ ,  $\beta_1 = 1$  with  $\rho = 0$ , representing a MAR mechanism, and  $\rho = 0.3$  and  $0.6$ , representing an MNAR mechanism, in the presence of missing data on  $X_2$ .

Table S8: Binary  $Y$ : Simulation results for  $\beta_2 = 1$  with  $\rho = 0$ , representing a MAR mechanism, and  $\rho = 0.3$  and  $0.6$ , representing an MNAR mechanism.

| Methods         | $\rho$ | $\%Rbias$ | $SE_{cal}$ | $SE_{emp}$ | RMSE  | Cover |
|-----------------|--------|-----------|------------|------------|-------|-------|
| Before deletion | 0      | 1.1       | 0.109      | 0.109      | 0.109 | 95.1  |
|                 | 0.3    | 1.2       | 0.109      | 0.110      | 0.111 | 95.7  |
|                 | 0.6    | 0.9       | 0.109      | 0.112      | 0.112 | 94.8  |
| CCA             | 0      | 1.2       | 0.133      | 0.134      | 0.134 | 94.5  |
|                 | 0.3    | 7.2       | 0.135      | 0.135      | 0.153 | 93.7  |
|                 | 0.6    | 16.7      | 0.140      | 0.150      | 0.224 | 80.7  |
| HEml            | 0      | -0.1      | 0.140      | 0.140      | 0.140 | 94.8  |
|                 | 0.3    | 0.4       | 0.149      | 0.145      | 0.145 | 95.5  |
|                 | 0.6    | 0.8       | 0.156      | 0.165      | 0.166 | 93.5  |
| MIHEml          | 0      | -1.0      | 0.139      | 0.138      | 0.138 | 94.1  |
|                 | 0.3    | -0.2      | 0.148      | 0.142      | 0.142 | 95.5  |
|                 | 0.6    | 0.9       | 0.157      | 0.162      | 0.162 | 93.9  |

$\%Rbias$ : % relative bias;  $SE_{cal}$ : Root mean square of the estimated standard error;  $SE_{emp}$ : Empirical Monte Carlo standard error; RMSE: Root mean square error; Cover: % coverage of the nominal 95% confidence interval; CCA: Complete case analysis; HEml: Heckman's one-step ML estimation; MIHEml: Multiple imputation using Heckman's one-step ML estimation.

Table S9: Continuous  $Y$ : Simulation results for  $\beta_2 = 1$  with  $\rho = 0$ , representing a MAR mechanism, and  $\rho = 0.3$  and  $0.6$ , representing an MNAR mechanism.

| Methods         | $\rho$ | $\%Rbias$ | $SE_{cal}$ | $SE_{emp}$ | RMSE  | Cover |
|-----------------|--------|-----------|------------|------------|-------|-------|
| Before deletion | 0      | -0.1      | 0.064      | 0.065      | 0.065 | 93.9  |
|                 | 0.3    | 0.0       | 0.063      | 0.063      | 0.063 | 95.2  |
|                 | 0.6    | -0.1      | 0.064      | 0.066      | 0.066 | 93.5  |
| CCA             | 0      | -0.3      | 0.079      | 0.079      | 0.079 | 94.7  |
|                 | 0.3    | 4.4       | 0.078      | 0.077      | 0.089 | 91.1  |
|                 | 0.6    | 8.9       | 0.075      | 0.077      | 0.117 | 77.8  |
| HEml            | 0      | -0.4      | 0.085      | 0.086      | 0.086 | 94.4  |
|                 | 0.3    | 0.1       | 0.083      | 0.085      | 0.085 | 94.9  |
|                 | 0.6    | 0.2       | 0.080      | 0.082      | 0.082 | 93.6  |
| MIHEml          | 0      | -0.4      | 0.086      | 0.087      | 0.087 | 94.6  |
|                 | 0.3    | 0.0       | 0.086      | 0.086      | 0.086 | 95.2  |
|                 | 0.6    | 0.1       | 0.084      | 0.082      | 0.082 | 94.6  |
| HE2steps        | 0      | -0.4      | 0.085      | 0.085      | 0.085 | 95.1  |
|                 | 0.3    | 0.1       | 0.084      | 0.086      | 0.086 | 95.3  |
|                 | 0.6    | 0.1       | 0.083      | 0.084      | 0.084 | 94.6  |
| MIHE2steps      | 0      | -0.4      | 0.086      | 0.085      | 0.085 | 95.5  |
|                 | 0.3    | 0.1       | 0.085      | 0.086      | 0.086 | 95.0  |
|                 | 0.6    | 0.1       | 0.084      | 0.084      | 0.084 | 95.0  |

$\%Rbias$ : % relative bias;  $SE_{cal}$ : Root mean square of the estimated standard error;  $SE_{emp}$ : Empirical Monte Carlo standard error; RMSE: Root mean square error; Cover: % coverage of the nominal 95% confidence interval; CCA: Complete case analysis; HEml: Heckman one-step ML estimation; MIHEml: Multiple imputation using Heckman's one-step ML estimation; HE2steps: Heckman's two-step estimation; MIHE2steps: Multiple imputation using Heckman's two-step estimation.

Table S10: Binary  $Y$ : Simulation results for  $\beta_2 = 1$  with  $\rho = 0$ , representing a MAR mechanism, and  $\rho = 0.3$  and  $0.6$ , representing an MNAR mechanism, in the presence of missing data on  $X_2$ .

| Methods         | $\rho$ | $R_2$ depends on $X_1$ and $X_3$ |            |       |       | $R_2$ depends on $X_1$ and $Y$ |            |       |       |
|-----------------|--------|----------------------------------|------------|-------|-------|--------------------------------|------------|-------|-------|
|                 |        | $\%Rbias$                        | $SE_{cal}$ | RMSE  | Cover | $\%Rbias$                      | $SE_{cal}$ | RMSE  | Cover |
| Before deletion | 0      | 1.0                              | 0.109      | 0.110 | 95.6  | 0.4                            | 0.109      | 0.113 | 93.9  |
|                 | 0.3    | 0.9                              | 0.109      | 0.112 | 94.6  | 1.3                            | 0.109      | 0.110 | 95.5  |
|                 | 0.6    | 1.2                              | 0.109      | 0.109 | 95.6  | 0.7                            | 0.109      | 0.109 | 94.2  |
| CCA             | 0      | 1.6                              | 0.149      | 0.150 | 95.1  | 0.9                            | 0.153      | 0.156 | 95.1  |
|                 | 0.3    | 7.5                              | 0.153      | 0.177 | 92.9  | 7.3                            | 0.158      | 0.180 | 93.3  |
|                 | 0.6    | 16.0                             | 0.158      | 0.228 | 84.8  | 15.0                           | 0.165      | 0.223 | 88.1  |
| HEml            | 0      | -0.9                             | 0.160      | 0.161 | 94.4  | -1.1                           | 0.163      | 0.161 | 94.8  |
|                 | 0.3    | 0.4                              | 0.170      | 0.175 | 94.3  | 0.1                            | 0.174      | 0.176 | 94.7  |
|                 | 0.6    | 1.3                              | 0.177      | 0.181 | 94.4  | -0.2                           | 0.181      | 0.185 | 94.2  |
| MIHEml          | 0      | -1.6                             | 0.155      | 0.151 | 94.9  | -1.8                           | 0.161      | 0.159 | 95.2  |
|                 | 0.3    | -0.6                             | 0.162      | 0.162 | 95.7  | -0.6                           | 0.169      | 0.167 | 95.7  |
|                 | 0.6    | 1.5                              | 0.171      | 0.164 | 95.8  | 0.1                            | 0.177      | 0.169 | 95.8  |

$\%Rbias$ : % relative bias;  $SE_{cal}$ : Root mean square of the estimated standard error;  $SE_{emp}$ : Empirical Monte Carlo standard error; RMSE: Root mean square error; Cover: % coverage of the nominal 95% confidence interval; CCA: Complete case analysis; HEml: Heckman's one-step ML estimation; MIHEml: Multiple imputation using Heckman's one-step ML estimation.

Table S11: Continuous  $Y$ : Simulation results for  $\beta_2 = 1$  with  $\rho = 0$ , representing a MAR mechanism, and  $\rho = 0.3$  and  $0.6$ , representing an MNAR mechanism, in the presence of MAR missing data on  $X_2$ .

| Methods         | $\rho$ | $R_2$ depends on $X_1$ and $X_3$ |            |       |       | $R_2$ depends on $X_1$ and $Y$ |            |       |       |
|-----------------|--------|----------------------------------|------------|-------|-------|--------------------------------|------------|-------|-------|
|                 |        | $\%Rbias$                        | $SE_{cal}$ | RMSE  | Cover | $\%Rbias$                      | $SE_{cal}$ | RMSE  | Cover |
| Before deletion | 0      | 0.2                              | 0.063      | 0.063 | 95.2  | 0.0                            | 0.063      | 0.062 | 95.1  |
|                 | 0.3    | -0.2                             | 0.063      | 0.062 | 95.3  | -0.3                           | 0.063      | 0.062 | 95.0  |
|                 | 0.6    | 0.0                              | 0.064      | 0.062 | 95.3  | -0.1                           | 0.063      | 0.062 | 95.5  |
| CCA             | 0      | 0.4                              | 0.087      | 0.085 | 95.9  | -14.9                          | 0.086      | 0.171 | 58.6  |
|                 | 0.3    | 3.6                              | 0.086      | 0.092 | 93.5  | -10.8                          | 0.084      | 0.137 | 75.0  |
|                 | 0.6    | 8.1                              | 0.083      | 0.114 | 84.4  | -6.4                           | 0.081      | 0.104 | 87.4  |
| HEml            | 0      | 0.4                              | 0.095      | 0.096 | 94.6  | -15.6                          | 0.094      | 0.181 | 62.1  |
|                 | 0.3    | 0.0                              | 0.093      | 0.091 | 95.5  | -15.2                          | 0.093      | 0.179 | 61.3  |
|                 | 0.6    | 0.5                              | 0.090      | 0.088 | 95.3  | -14.9                          | 0.089      | 0.175 | 60.1  |
| MIHEml          | 0      | 0.4                              | 0.092      | 0.089 | 94.6  | -1.3                           | 0.100      | 0.095 | 96.9  |
|                 | 0.3    | -0.3                             | 0.090      | 0.087 | 95.5  | -2.0                           | 0.098      | 0.094 | 95.0  |
|                 | 0.6    | -0.2                             | 0.089      | 0.085 | 95.3  | -3.4                           | 0.094      | 0.095 | 95.3  |
| HE2steps        | 0      | 0.4                              | 0.096      | 0.096 | 94.4  | -15.3                          | 0.093      | 0.177 | 62.1  |
|                 | 0.3    | -0.2                             | 0.095      | 0.092 | 95.8  | -14.6                          | 0.092      | 0.173 | 65.1  |
|                 | 0.6    | 0.4                              | 0.094      | 0.090 | 95.4  | -14.2                          | 0.092      | 0.169 | 66.9  |
| MIHE2steps      | 0      | 0.5                              | 0.091      | 0.089 | 94.7  | -1.1                           | 0.099      | 0.095 | 96.2  |
|                 | 0.3    | -0.3                             | 0.091      | 0.087 | 94.5  | -2.2                           | 0.099      | 0.097 | 95.1  |
|                 | 0.6    | -0.2                             | 0.091      | 0.086 | 96.0  | -4.5                           | 0.098      | 0.105 | 93.6  |

$\%Rbias$ : % relative bias;  $SE_{cal}$ : Root mean square of the estimated standard error;  $SE_{emp}$ : Empirical Monte Carlo standard error; RMSE: Root mean square error; Cover: % coverage of the nominal 95% confidence interval; CCA: Complete case analysis; HEml: Heckman one-step ML estimation; MIHEml: Multiple imputation using Heckman's one-step ML estimation; HE2steps: Heckman's two-step estimation; MIHE2steps: Multiple imputation using Heckman's two-step estimation.

Table S12: Binary  $Y$ : Simulation results for  $n=200$ ,  $\beta_1 = 1$  with  $\rho = 0$ , representing a MAR mechanism, and  $\rho = 0.3$  and  $0.6$ , representing an MNAR mechanism.

| Methods         | $\rho$ | $\%Rbias$ | $SE_{cal}$ | $SE_{emp}$ | RMSE  | Cover |
|-----------------|--------|-----------|------------|------------|-------|-------|
| Before deletion | 0      | 1.8       | 0.174      | 0.182      | 0.183 | 93.8  |
|                 | 0.3    | 3.8       | 0.176      | 0.182      | 0.186 | 95.5  |
|                 | 0.6    | 2.3       | 0.175      | 0.183      | 0.184 | 94.8  |
| CCA             | 0      | 3.5       | 0.222      | 0.237      | 0.239 | 94.5  |
|                 | 0.3    | -3.0      | 0.220      | 0.228      | 0.230 | 94.1  |
|                 | 0.6    | -9.8      | 0.219      | 0.237      | 0.256 | 89.6  |
| HEml            | 0      | 0.0       | 0.253      | 0.271      | 0.271 | 91.9  |
|                 | 0.3    | 0.7       | 0.239      | 0.239      | 0.238 | 94.4  |
|                 | 0.6    | 0.7       | 0.221      | 0.234      | 0.234 | 94.8  |
| MIHEml          | 0      | -1.1      | 0.248      | 0.260      | 0.260 | 93.9  |
|                 | 0.3    | -0.9      | 0.237      | 0.234      | 0.234 | 95.2  |
|                 | 0.6    | -1.3      | 0.223      | 0.234      | 0.234 | 95.1  |

$\%Rbias$ : % relative bias;  $SE_{cal}$ : Root mean square of the estimated standard error;  $SE_{emp}$ : Empirical Monte Carlo standard error; RMSE: Root mean square error; Cover: % coverage of the nominal 95% confidence interval; CCA: Complete case analysis; HEml: Heckman's one-step ML estimation; MIHEml: Multiple imputation using Heckman's one-step ML estimation.

Table S13: Continuous  $Y$ : Simulation results for  $n=200$ ,  $\beta_1 = 1$  with  $\rho = 0$ , representing a MAR mechanism, and  $\rho = 0.3$  and  $0.6$ , representing an MNAR mechanism.

| Methods         | $\rho$ | $\%Rbias$ | $SE_{cal}$ | $SE_{emp}$ | RMSE  | Cover |
|-----------------|--------|-----------|------------|------------|-------|-------|
| Before deletion | 0      | -0.7      | 0.101      | 0.102      | 0.102 | 95.2  |
|                 | 0.3    | 0.7       | 0.101      | 0.100      | 0.101 | 94.6  |
|                 | 0.6    | -0.2      | 0.101      | 0.096      | 0.096 | 96.2  |
| CCA             | 0      | -0.8      | 0.132      | 0.132      | 0.132 | 95.0  |
|                 | 0.3    | -8.1      | 0.131      | 0.124      | 0.148 | 90.9  |
|                 | 0.6    | -17.6     | 0.125      | 0.123      | 0.215 | 70.9  |
| HE2steps        | 0      | -0.6      | 0.166      | 0.170      | 0.170 | 94.1  |
|                 | 0.3    | 0.9       | 0.165      | 0.158      | 0.158 | 95.7  |
|                 | 0.6    | -0.4      | 0.161      | 0.159      | 0.159 | 95.4  |
| MIHE2steps      | 0      | -0.6      | 0.172      | 0.172      | 0.172 | 94.8  |
|                 | 0.3    | 0.7       | 0.171      | 0.159      | 0.159 | 96.5  |
|                 | 0.6    | -0.3      | 0.168      | 0.159      | 0.159 | 95.4  |
| HEml            | 0      | -0.6      | 0.163      | 0.173      | 0.173 | 92.6  |
|                 | 0.3    | 0.7       | 0.159      | 0.156      | 0.156 | 94.3  |
|                 | 0.6    | -0.7      | 0.147      | 0.152      | 0.152 | 93.5  |
| MIHEml          | 0      | -0.5      | 0.168      | 0.176      | 0.176 | 93.8  |
|                 | 0.3    | 0.8       | 0.166      | 0.158      | 0.159 | 95.1  |
|                 | 0.6    | -0.5      | 0.157      | 0.154      | 0.154 | 94.2  |

$\%Rbias$ : % relative bias;  $SE_{cal}$ : Root mean square of the estimated standard error;  $SE_{emp}$ : Empirical Monte Carlo standard error; RMSE: Root mean square error; Cover: % coverage of the nominal 95% confidence interval; CCA: Complete case analysis; HEml: Heckman one-step ML estimation; MIHEml: Multiple imputation using Heckman's one-step ML estimation; HE2steps: Heckman's two-step estimation; MIHE2steps: Multiple imputation using Heckman's two-step estimation.

Table S14: Binary  $Y$ : Simulation results for  $n=200$ ,  $\beta_1 = 1$  with  $\rho = 0$ , representing a MAR mechanism, and  $\rho = 0.3$  and  $0.6$ , representing an MNAR mechanism, in the presence of missing data on  $X_2$ .

| Methods         | $\rho$ | $R_2$ depends on $X_1$ and $X_3$ |            |       |       | $R_2$ depends on $X_1$ and $Y$ |            |       |       |
|-----------------|--------|----------------------------------|------------|-------|-------|--------------------------------|------------|-------|-------|
|                 |        | $\%Rbias$                        | $SE_{cal}$ | RMSE  | Cover | $\%Rbias$                      | $SE_{cal}$ | RMSE  | Cover |
| Before deletion | 0      | 3.1                              | 0.175      | 0.183 | 95.1  | 2.8                            | 0.175      | 0.185 | 94.8  |
|                 | 0.3    | 2.7                              | 0.175      | 0.185 | 95.1  | 3.0                            | 0.175      | 0.179 | 95.3  |
|                 | 0.6    | 2.4                              | 0.175      | 0.183 | 94.4  | 2.5                            | 0.175      | 0.188 | 93.9  |
| CCA             | 0      | 5.2                              | 0.259      | 0.266 | 96.1  | -17.5                          | 0.269      | 0.332 | 87.3  |
|                 | 0.3    | -2.4                             | 0.256      | 0.263 | 94.5  | -25.8                          | 0.267      | 0.382 | 79.4  |
|                 | 0.6    | -4.0                             | 0.259      | 0.281 | 94.6  | -31.0                          | 0.268      | 0.415 | 73.8  |
| HEml            | 0      | 0.1                              | 0.279      | 0.281 | 93.4  | -20.1                          | 0.293      | 0.368 | 85.4  |
|                 | 0.3    | -2.2                             | 0.267      | 0.274 | 93.3  | -21.0                          | 0.283      | 0.358 | 87.4  |
|                 | 0.6    | 0.7                              | 0.258      | 0.271 | 94.3  | -21.7                          | 0.268      | 0.349 | 84.6  |
| MIHEml          | 0      | -1.0                             | 0.260      | 0.249 | 95.1  | -1.9                           | 0.260      | 0.251 | 95.2  |
|                 | 0.3    | -3.7                             | 0.248      | 0.238 | 96.1  | -2.5                           | 0.248      | 0.248 | 94.1  |
|                 | 0.6    | -2.2                             | 0.238      | 0.232 | 96.4  | -3.5                           | 0.237      | 0.241 | 95.0  |

$\%Rbias$ : % relative bias;  $SE_{cal}$ : Root mean square of the estimated standard error;  $SE_{emp}$ : Empirical Monte Carlo standard error; RMSE: Root mean square error; Cover: % coverage of the nominal 95% confidence interval; CCA: Complete case analysis; HEml: Heckman's one-step ML estimation; MIHEml: Multiple imputation using Heckman's one-step ML estimation.

Table S15: Continuous  $Y$ : Simulation results for  $n=200$ ,  $\beta_1 = 1$  with  $\rho = 0$ , representing a MAR mechanism, and  $\rho = 0.3$  and  $0.6$ , representing an MNAR mechanism, in the presence of missing data on  $X_2$ .

| Methods         | $\rho$ | $R_2$ depends on $X_1$ and $X_3$ |            |       |       | $R_2$ depends on $X_1$ and $Y$ |            |       |       |
|-----------------|--------|----------------------------------|------------|-------|-------|--------------------------------|------------|-------|-------|
|                 |        | $\%Rbias$                        | $SE_{cal}$ | RMSE  | Cover | $\%Rbias$                      | $SE_{cal}$ | RMSE  | Cover |
| Before deletion | 0      | -0.1                             | 0.1        | 0.1   | 93.4  | 0.3                            | 0.101      | 0.099 | 95.0  |
|                 | 0.3    | 0.1                              | 0.101      | 0.098 | 95.3  | 0.0                            | 0.101      | 0.103 | 94.5  |
|                 | 0.6    | -0.2                             | 0.101      | 0.099 | 95.8  | -0.1                           | 0.101      | 0.100 | 95.0  |
| CCA             | 0      | -0.2                             | 0.15       | 0.146 | 95.9  | -29.2                          | 0.156      | 0.333 | 53.3  |
|                 | 0.3    | -6.6                             | 0.149      | 0.16  | 93.1  | -34.4                          | 0.150      | 0.376 | 36.9  |
|                 | 0.6    | -12.5                            | 0.145      | 0.194 | 87.5  | -37.9                          | 0.143      | 0.406 | 25.2  |
| HE2steps        | 0      | -0.5                             | 0.184      | 0.185 | 96.1  | -28.2                          | 0.189      | 0.347 | 65.0  |
|                 | 0.3    | 0.2                              | 0.185      | 0.184 | 95.8  | -28.4                          | 0.177      | 0.336 | 62.8  |
|                 | 0.6    | -0.2                             | 0.182      | 0.185 | 94.8  | -27.3                          | 0.168      | 0.326 | 61.1  |
| MIHE2steps      | 0      | -0.9                             | 0.174      | 0.166 | 96.5  | 1.0                            | 0.181      | 0.175 | 96.0  |
|                 | 0.3    | -0.6                             | 0.174      | 0.164 | 95.8  | -0.5                           | 0.177      | 0.170 | 96.0  |
|                 | 0.6    | -1.3                             | 0.172      | 0.168 | 95.5  | -0.9                           | 0.173      | 0.171 | 95.0  |
| HEml            | 0      | -0.5                             | 0.173      | 0.185 | 93.9  | -28.0                          | 0.183      | 0.350 | 62.4  |
|                 | 0.3    | -0.5                             | 0.172      | 0.182 | 94    | -28.1                          | 0.171      | 0.336 | 61.4  |
|                 | 0.6    | -1                               | 0.164      | 0.178 | 93.1  | -27.3                          | 0.156      | 0.322 | 58.1  |
| MIHEml          | 0      | -0.6                             | 0.172      | 0.165 | 95.8  | 1.5                            | 0.179      | 0.173 | 95.4  |
|                 | 0.3    | -1.4                             | 0.173      | 0.161 | 95.9  | -0.5                           | 0.176      | 0.166 | 95.6  |
|                 | 0.6    | -2.3                             | 0.167      | 0.157 | 95.6  | -1.9                           | 0.166      | 0.159 | 96.4  |

$\%Rbias$ : % relative bias;  $SE_{cal}$ : Root mean square of the estimated standard error;  $SE_{emp}$ : Empirical Monte Carlo standard error; RMSE: Root mean square error; Cover: % coverage of the nominal 95% confidence interval; CCA: Complete case analysis; HEml: Heckman one-step ML estimation; MIHEml: Multiple imputation using Heckman's one-step ML estimation; HE2steps: Heckman's two-step estimation; MIHE2steps: Multiple imputation using Heckman's two-step estimation.
