# Supplementary material for: Heckman imputation models for binary or continuous MNAR outcomes and MAR predictors
Source: Springer Nature journal article supplement (doi:10.1186/s12874-018-0547-1), 2018-08-31
Supplement: MOESM2 [file 16089134]

# Heckman imputation models for binary or continuous MNAR outcomes and MAR predictors

J.-E. Galimard, S. Chevret, E. Curis and M. Resche-Rigon

## Additional file 2: Comparison to Ogundimu and Collins

Ogundimu and Collins (2017) developed an imputation model using the selection-t model (Heckman's model with bivariate Student distribution for error terms). Marchenko and Genton (2012) proposed the previous distribution as a robust alternative to the bivariate normal distribution assumption of Heckman's model. The use of the bivariate distribution modifies the likelihood function and conditional moment. Therefore, such a distribution requires estimating a supplementary parameter: the degree of freedom. Using this distribution, Ogundimu and Collins (2017) imputed missing data from the conditional expectation of missing data as Galimard et al. (2016) but using a type of modified *IMR* by degree of freedom, PDF and CDF of univariate Student distribution. Unfortunately, this imputation model is only available for continuous outcomes.

We compared the proposition of the current paper to the propositions of Ogundimu and Collins (2017) and Galimard et al. (2016) using the same simulation plan performed in the current paper. Moreover, additional simulations scenarios were added:

- Generation of errors term from a bivariate Student distribution according to the following model and  $\nu = 5$  degrees of freedom:

$$\begin{matrix} R'_{yi} = X_i^s \beta^s + \varepsilon_i^s \\ Y_i = X_i \beta + \varepsilon_i \end{matrix}, \quad \text{with} \quad \begin{pmatrix} \varepsilon^s \\ \varepsilon \end{pmatrix} \sim T \left[ \begin{pmatrix} 0 \\ 0 \end{pmatrix}, \begin{pmatrix} 1 & \rho\sigma_\varepsilon \\ \rho\sigma_\varepsilon & \sigma_\varepsilon^2 \end{pmatrix}, \nu \right] \quad (1)$$

- Absence of exclusion-restriction with  $\beta_3^s = 0$ .

The analysis methods were same as in the current paper for continuous case and adding the following:

- Multiple imputation using bivariate Student estimation (*MIHeckST*), as proposed and described by Ogundimu and Collins (2017) and only for continuous outcomes.

The results are presented in Tables 16, 17, 18, 19 and 20.

Table 16: Continuous  $Y$ : Simulation results for  $\beta_1 = 1$  with  $\rho = 0$ , representing a MAR mechanism, and  $\rho = 0.3$  and  $0.6$ , representing an MNAR mechanism.

| Methods    | $\rho$ | $\%Rbias$ | $SE_{cal}$ | $SE_{emp}$ | RMSE  | Cover |
|------------|--------|-----------|------------|------------|-------|-------|
| MIHE2steps | 0      | 0.0       | 0.105      | 0.103      | 0.103 | 95.2  |
|            | 0.3    | -0.4      | 0.104      | 0.104      | 0.104 | 94.0  |
|            | 0.6    | -0.2      | 0.103      | 0.100      | 0.099 | 95.2  |
| MIHEml     | 0      | 0.0       | 0.105      | 0.103      | 0.103 | 94.7  |
|            | 0.3    | -0.3      | 0.103      | 0.102      | 0.102 | 95.3  |
|            | 0.6    | -0.3      | 0.096      | 0.094      | 0.094 | 94.8  |
| MIHeckST   | 0      | 0.0       | 0.112      | 0.105      | 0.105 | 96.4  |
|            | 0.3    | 0.0       | 0.110      | 0.103      | 0.103 | 96.1  |
|            | 0.6    | 0.3       | 0.104      | 0.093      | 0.093 | 96.5  |

$\%Rbias$ : % relative bias;  $SE_{cal}$ : Root mean square of the estimated standard error;  $SE_{emp}$ : Empirical Monte Carlo standard error; RMSE: Root mean square error; Cover: % coverage of the nominal 95% confidence interval; MIHE2steps: Multiple imputation using Heckman's two-step estimation; MIHEml: Multiple imputation using Heckman's one-step ML estimation; MIHeckST: Multiple imputation using bivariate Student estimation

Table 17: Continuous  $Y$ : Simulation results using Heckman's model with bivariate Student distribution, for  $\beta_1 = 1$  with  $\rho = 0$ , representing a MAR mechanism, and  $\rho = 0.3$  and  $0.6$ , representing a MNAR mechanism.

| Methods    | $\rho$ | $\%Rbias$ | $SE_{cal}$ | $SE_{emp}$ | RMSE  | Cover |
|------------|--------|-----------|------------|------------|-------|-------|
| MIHE2steps | 0      | 0.2       | 0.131      | 0.130      | 0.130 | 94.9  |
|            | 0.3    | 0.8       | 0.135      | 0.138      | 0.138 | 94.4  |
|            | 0.6    | 1.4       | 0.133      | 0.129      | 0.130 | 96.2  |
| MIHEml     | 0      | 0.2       | 0.137      | 0.132      | 0.131 | 95.2  |
|            | 0.3    | 1.2       | 0.142      | 0.140      | 0.141 | 94.9  |
|            | 0.6    | 4.5       | 0.136      | 0.129      | 0.136 | 95.4  |
| MIHeckST   | 0      | 0.3       | 0.123      | 0.116      | 0.116 | 95.5  |
|            | 0.3    | 0.4       | 0.125      | 0.118      | 0.118 | 95.5  |
|            | 0.6    | 0.9       | 0.120      | 0.107      | 0.107 | 97.3  |

$\%Rbias$ : % relative bias;  $SE_{cal}$ : Root mean square of the estimated standard error;  $SE_{emp}$ : Empirical Monte Carlo standard error; RMSE: Root mean square error; Cover: % coverage of the nominal 95% confidence interval; MIHE2steps: Multiple imputation using Heckman's two-step estimation; MIHEml: Multiple imputation using Heckman's one-step ML estimation; MIHeckST: Multiple imputation using bivariate Student estimation

Table 18: Continuous  $Y$ : Simulation results using Heckman’s model without exclusion-restriction, for  $\beta_1 = 1$  with  $\rho = 0$ , representing a MAR mechanism, and  $\rho = 0.3$  and  $0.6$ , representing an MNAR mechanism.

| Methods    | $\rho$ | $\%Rbias$ | $SE_{cal}$ | $SE_{emp}$ | RMSE  | Cover |
|------------|--------|-----------|------------|------------|-------|-------|
| MIHE2steps | 0      | -1.4      | 0.248      | 0.242      | 0.242 | 95.6  |
|            | 0.3    | -1.9      | 0.244      | 0.236      | 0.237 | 96.4  |
|            | 0.6    | -2.3      | 0.234      | 0.226      | 0.227 | 95.4  |
| MIHEml     | 0      | -1.8      | 0.164      | 0.187      | 0.187 | 85.8  |
|            | 0.3    | -5.6      | 0.153      | 0.192      | 0.200 | 83.5  |
|            | 0.6    | -6.4      | 0.131      | 0.187      | 0.197 | 84.8  |
| MIHeckST   | 0      | -1.4      | 0.174      | 0.199      | 0.199 | 85.2  |
|            | 0.3    | -5.3      | 0.163      | 0.200      | 0.207 | 82.9  |
|            | 0.6    | -5.0      | 0.138      | 0.185      | 0.192 | 88.2  |

$\%Rbias$ : % relative bias;  $SE_{cal}$ : Root mean square of the estimated standard error;  $SE_{emp}$ : Empirical Monte Carlo standard error; RMSE: Root mean square error; Cover: % coverage of the nominal 95% confidence interval; MIHE2steps: Multiple imputation using Heckman’s two-step estimation; MIHEml: Multiple imputation using Heckman’s one-step ML estimation; MIHeckST: Multiple imputation using bivariate Student estimation

Table 19: Continuous  $Y$  and logit selection model: Simulation results for  $\beta_1 = 1$  estimates.

| Methods    | $\beta_Y^{sl}$ | $\%Rbias$ | $SE_{cal}$ | $SE_{emp}$ | RMSE  | Cover |
|------------|----------------|-----------|------------|------------|-------|-------|
| MIHE2steps | 0              | 0.3       | 0.110      | 0.106      | 0.106 | 95.5  |
|            | 1              | 0.9       | 0.151      | 0.159      | 0.159 | 94.6  |
|            | 2              | 0.0       | 0.163      | 0.166      | 0.166 | 94.8  |
| MIHEml     | 0              | 0.3       | 0.107      | 0.110      | 0.110 | 94.0  |
|            | 1              | -1.2      | 0.121      | 0.133      | 0.134 | 92.6  |
|            | 2              | -1.3      | 0.105      | 0.113      | 0.114 | 94.7  |
| MIHeckST   | 0              | 0.2       | 0.114      | 0.110      | 0.110 | 96.0  |
|            | 1              | -0.7      | 0.128      | 0.133      | 0.134 | 94.7  |
|            | 2              | -0.1      | 0.111      | 0.103      | 0.103 | 96.9  |

$\%Rbias$ : % relative bias;  $SE_{cal}$ : Root mean square of the estimated standard error;  $SE_{emp}$ : Empirical Monte Carlo standard error; RMSE: Root mean square error; Cover: % coverage of the nominal 95% confidence interval; MIHE2steps: Multiple imputation using Heckman’s two-step estimation; MIHEml: Multiple imputation using Heckman’s one-step ML estimation; MIHeckST: Multiple imputation using bivariate Student estimation

Table 20: Continuous  $Y$ : Simulation results for  $\beta_1 = 1$  with  $\rho = 0$ , representing a MAR mechanism, and  $\rho = 0.3$  and  $0.6$ , representing an MNAR mechanism, in the presence of missing data on  $X_2$ .

| Methods    | $\rho$ | $R_2$ depends on $X_1$ and $X_3$ |            |       |       | $R_2$ depends on $X_1$ and $Y$ |            |       |       |
|------------|--------|----------------------------------|------------|-------|-------|--------------------------------|------------|-------|-------|
|            |        | $\%Rbias$                        | $SE_{cal}$ | RMSE  | Cover | $\%Rbias$                      | $SE_{cal}$ | RMSE  | Cover |
| MIHE2steps | 0      | -0.1                             | 0.107      | 0.101 | 95.5  | 1.1                            | 0.110      | 0.107 | 96.1  |
|            | 0.3    | -0.6                             | 0.106      | 0.112 | 93.1  | 0.0                            | 0.108      | 0.110 | 94.7  |
|            | 0.6    | -1.5                             | 0.105      | 0.105 | 94.8  | -1.3                           | 0.105      | 0.102 | 94.5  |
| MIHEml     | 0      | -0.1                             | 0.107      | 0.103 | 95.0  | 1.2                            | 0.111      | 0.107 | 95.8  |
|            | 0.3    | -0.9                             | 0.105      | 0.109 | 94.1  | -0.1                           | 0.108      | 0.107 | 93.7  |
|            | 0.6    | -2.2                             | 0.101      | 0.099 | 94.9  | -1.7                           | 0.103      | 0.097 | 94.2  |
| MIHeckST   | 0      | -0.4                             | 0.114      | 0.106 | 95.5  | 1.6                            | 0.116      | 0.108 | 96.3  |
|            | 0.3    | -0.8                             | 0.113      | 0.109 | 96.0  | 0.6                            | 0.114      | 0.108 | 96.2  |
|            | 0.6    | -1.8                             | 0.108      | 0.100 | 96.4  | -0.9                           | 0.108      | 0.094 | 97.2  |

$\%Rbias$ : % relative bias;  $SE_{cal}$ : Root mean square of the estimated standard error;  $SE_{emp}$ : Empirical Monte Carlo standard error; RMSE: Root mean square error; Cover: % coverage of the nominal 95% confidence interval; MIHE2steps: Multiple imputation using Heckman's two-step estimation; MIHEml: Multiple imputation using Heckman's one-step ML estimation; MIHeckST: Multiple imputation using bivariate Student estimation

# Bibliography

Galimard, J.-E., Chevret, S., Protopopescu, C., and Resche-Rigon, M. (2016). A multiple imputation approach for MNAR mechanisms compatible with Heckman's model. *Stat Med*, 35(17):2907–2920.

Marchenko, Y. V. and Genton, M. G. (2012). A heckman selection-t model. *J Am Stat Assoc*, 107(497):304–317.

Ogundimu, E. O. and Collins, G. S. (2017). A robust imputation method for missing responses and covariates in sample selection models. *Stat Meth Med Res*, 0(0).
