# Supplementary material for: Heckman imputation models for binary or continuous MNAR outcomes and MAR predictors
Source: Springer Nature journal article supplement (doi:10.1186/s12874-018-0547-1), 2018-08-31
Supplement: MOESM3 [file 16089134]

# Heckman imputation models for binary or continuous MNAR outcomes and MAR predictors

J.-E. Galimard, S. Chevret, E. Curis and M. Resche-Rigon

## Additional file 3: BIVIR study group

**Scientific Committee: Steering Committee:** Leport C (principal investigator), Andreoletti L, Blanchon T, Carrat F, Duval X, Guimfack A, Lina L, Loubière S, Mentré F, Mosnier A, Tibi A, Tubach F, van der Werf S. *Clinical Study manager:* Charlois - Ou C. *Other members:* Bricaire F, Cohen JM, Flahault A, Moatti JP, Vogel JY. *Invited members:* Eid Z (GSK), Peurichard C (GSK), Pecking M (Roche), Dantin S (Roche), Gysembergh-Houal A (AP-HP).

**Independent data-monitoring committee:** Chêne G, Hannoun C, Vittecoq D.

**Monitoring and statistical analysis:** Boucherit S, Dornic Q, Quintin C, Vincent C., and Atlanstat, Studypharm clinical research organisations.

**Clinical investigators:** Alea JR, Aleonard JL, Arditti L, Baranes C, Beaujard J, Beaurain C, Behar M, Beignot-Devalmont P, Biquet D, Blanchard M, Blot E, Bodin X, Bouaniche H, Boulet L, Bourgeois O, Bretillon F, Breton N, Broyer F, Buffler P, Camper E, Carissimo P, Carrera J, Causse P, Cayet JP, Cayron P, Cazard C, Chaix C, Chazerans D, Cheftel JA, Codron G, Cooren G, Coutrey L, Crappier JJ, Daugenet C, Dauzat C, Defreyn F, Delamare G, Delsart D, Demure P, Desmarchelier P, Domenech A, Dubois D Laroy G, Dubrana E, Dumond P, Dumont A, Durel G, Ellé P, Evellin F, Eyraud P, Fhal G, Fournillou JC, Galesne Herceg G, Gastan G, Geoffray B, Giagnorio P, Goguel J, Granger JF, Guenee P, Haushalter B, Huber C, Hureau JP, Jacob L, Jami A, Jordan E, Jourde P, Journet L, Julien D, Jusserand JT, Korsec P, Laforest G, Lalanne G, Le Duff N, Le Guen-Naas A, Le Hir A, Lebois S, Leclerc S, Leclere V, Lejay D, Lejoly JM, Lemoine C, Lepine C, Lepoutre B, Leprince P, Lhoumeau P, Lognos B, Lustig G, Mannessier B, Marlier M, Marmor P, Martocq G, Massot J, Meme B, Mercier P, Mercier G, Mesnier PL, Meyrand G, Mongin G, Montavont J, Morlon P, Pantea D, Parisot J, Partouche H, Pertusa MC, Petot A, Peyrol Y, Piketty B, Poignant G, Pradere H, Rabaud D, Rachine L, Ragon B, Rambaud J, Richard P, Rigaille P, Robinson D, Rosenberg S, Ruetsch M, Sacareau D, Saint Lannes M, Saugues M, Sauvage P, Schaupp T, Schmitt C, Sellam A, Severin JF, Simian B, Specht L, Szmuckler I, Tetaud D, Trehou P, Triantaphylides JC, Triot P, Uge P, Urbain F, Urbina JC, Vailler P, Vallez V, Varnier H, Venot N, Verhun R, Vogel JY, Zanuttini-Vogt C, Zeline V.
